# Supplementary material for: Lactate in Amniotic Fluid: Predictor of Labor Outcome in Oxytocin-Augmented Primiparas’ Deliveries
Source: PLoS One. 2016 Oct 26;11(10):e0161546. doi: 10.1371/journal.pone.0161546 (PMC5082650; doi:10.1371/journal.pone.0161546)
Supplement: S1 File — (XLSX) [file pone.0161546.s001.xlsx]

## Sheet: Blad1
Low/high AFL when started Oxytocin	Vaginal delivery
0	yes
0	yes
0	yes
0	yes
0	yes
0	yes
0	no
0	yes
0	yes
0	yes
0	yes
0	yes
0	yes
0	yes
0	yes
0	yes
0	yes
0	yes
0	yes
0	yes
0	yes
0	yes
0	yes
0	yes
0	yes
0	yes
0	no
0	yes
0	no
0	yes
0	yes
0	no
0	yes
0	yes
0	yes
0	yes
0	no
0	yes
0	yes
0	yes
0	no
0	yes
0	yes
0	yes
0	yes
0	yes
0	no
0	no
0	yes
0	yes
0	yes
0	yes
0	yes
0	yes
0	no
0	yes
0	yes
0	yes
0	yes
0	yes
0	yes
0	yes
0	yes
0	yes
0	yes
0	no
0	yes
0	yes
0	yes
0	no
0	yes
0	yes
0	yes
0	yes
0	no
0	yes
0	yes
0	yes
0	yes
0	yes
0	yes
0	yes
0	yes
0	yes
0	no
0	yes
0	yes
0	yes
0	yes
0	yes
0	no
0	yes
0	yes
0	yes
0	yes
0	yes
0	yes
0	yes
0	yes
0	no
0	no
0	yes
0	no
0	yes
0	yes
0	yes
0	yes
0	yes
0	yes
0	yes
0	yes
0	yes
0	yes
0	no
0	yes
0	no
0	yes
0	yes
0	no
0	no
0	yes
0	yes
0	yes
0	yes
0	yes
0	yes
0	yes
0	yes
0	no
0	yes
0	yes
0	yes
0	yes
0	yes
0	yes
0	yes
0	yes
0	no
0	no
0	yes
0	yes
0	yes
0	yes
0	no
0	no
0	no
0	yes
0	yes
0	yes
0	no
0	yes
0	no
0	yes
0	yes
0	yes
0	no
0	yes
0	no
0	no
0	yes
0	yes
0	yes
0	yes
0	yes
0	no
0	no
0	yes
0	yes
0	yes
0	no
0	yes
0	yes
0	yes
0	yes
0	no
0	yes
0	yes
0	yes
0	yes
0	yes
0	yes
0	yes
0	yes
0	yes
0	yes
0	yes
0	yes
0	yes
0	no
0	yes
0	yes
0	yes
0	yes
0	yes
0	yes
0	yes
0	no
0	yes
0	yes
0	yes
0	yes
0	no
0	yes
0	yes
0	yes
0	yes
0	yes
0	no
0	yes
0	no
0	yes
0	yes
0	yes
0	yes
0	yes
0	yes
0	yes
0	no
0	yes
0	yes
0	yes
0	yes
0	yes
0	yes
0	yes
0	yes
0	yes
0	yes
0	yes
0	no
0	yes
0	yes
0	yes
0	yes
0	yes
0	yes
0	yes
0	yes
0	yes
0	yes
0	yes
0	yes
0	yes
0	yes
0	yes
0	yes
0	yes
0	yes
0	yes
0	yes
0	no
0	yes
0	yes
0	yes
0	yes
0	yes
0	yes
0	yes
0	yes
0	yes
0	no
0	yes
0	yes
0	yes
0	yes
0	no
0	no
0	no
0	yes
0	yes
0	yes
0	yes
0	yes
0	yes
0	yes
0	yes
0	yes
0	yes
0	yes
0	yes
0	yes
0	yes
0	yes
0	yes
0	yes
0	yes
0	yes
0	yes
0	yes
0	yes
0	yes
0	yes
0	yes
0	yes
0	yes
0	yes
0	no
0	yes
0	yes
0	yes
0	yes
0	yes
0	yes
0	yes
0	yes
0	yes
0	yes
0	yes
0	yes
0	yes
0	yes
0	no
0	yes
0	yes
0	yes
0	yes
0	yes
0	yes
0	yes
0	yes
0	yes
0	yes
0	yes
0	yes
0	yes
0	yes
0	yes
0	yes
0	yes
0	yes
0	yes
0	yes
0	yes
0	yes
0	yes
0	yes
0	yes
0	yes
0	yes
0	yes
0	yes
0	yes
0	yes
0	yes
0	yes
0	yes
0	yes
0	yes
0	yes
0	yes
0	yes
0	yes
0	yes
0	yes
0	yes
0	yes
0	yes
0	yes
0	yes
0	yes
0	yes
0	yes
0	yes
0	yes
0	yes
0	yes
0	yes
0	yes
0	yes
0	yes
0	no
0	yes
0	yes
0	yes
0	yes
0	yes
0	yes
0	yes
0	yes
0	yes
0	yes
0	yes
0	no
0	yes
0	yes
0	yes
0	yes
0	yes
0	yes
0	yes
0	yes
0	yes
0	yes
0	yes
0	yes
0	yes
0	yes
0	yes
0	yes
0	yes
0	yes
0	yes
0	yes
0	yes
0	yes
0	yes
0	yes
0	yes
0	yes
0	yes
0	yes
0	yes
0	yes
0	yes
0	yes
0	yes
0	yes
0	yes
0	yes
0	yes
0	yes
0	yes
0	yes
0	yes
0	yes
0	yes
0	yes
0	yes
0	yes
0	no
0	yes
0	yes
0	yes
0	yes
0	yes
0	no
0	yes
0	yes
0	yes
0	yes
0	yes
0	yes
0	yes
0	yes
0	yes
0	yes
0	yes
0	yes
0	yes
0	yes
0	yes
0	yes
0	yes
0	yes
0	yes
0	yes
0	yes
0	yes
0	yes
0	yes
0	yes
0	no
0	yes
0	yes
0	yes
0	yes
0	yes
0	yes
0	yes
0	yes
0	yes
0	yes
0	yes
0	yes
0	yes
0	yes
0	yes
0	yes
0	yes
0	yes
0	yes
0	yes
0	yes
0	yes
0	yes
0	yes
0	yes
0	yes
0	yes
0	yes
0	yes
0	yes
0	yes
0	yes
0	no
0	yes
0	yes
0	yes
0	yes
0	yes
0	yes
0	yes
0	yes
0	yes
0	yes
0	yes
0	yes
0	yes
0	yes
0	yes
0	yes
0	yes
0	yes
0	yes
0	yes
0	yes
0	yes
0	yes
0	yes
0	yes
0	yes
0	yes
0	yes
0	yes
0	yes
0	yes
0	yes
0	yes
0	yes
0	yes
0	yes
0	yes
0	yes
0	yes
0	yes
0	yes
0	yes
0	yes
0	yes
0	yes
0	yes
0	yes
0	yes
0	yes
0	no
0	yes
0	yes
0	yes
0	yes
0	yes
0	yes
0	no
1	yes
1	yes
1	yes
1	yes
1	yes
1	yes
1	no
1	no
1	yes
1	yes
1	no
1	no
1	no
1	yes
1	yes
1	yes
1	yes
1	yes
1	yes
1	yes
1	yes
1	no
1	yes
1	no
1	yes
1	yes
1	yes
1	yes
1	yes
1	yes
1	yes
1	yes
1	yes
1	yes
1	no
1	no
1	yes
1	yes
1	yes
1	yes
1	yes
1	yes
1	yes
1	no
1	yes
1	yes
1	yes
1	yes
1	no
1	yes
1	no
1	yes
1	yes
1	yes
1	yes
1	yes
1	yes
1	yes
1	yes
1	yes
1	yes
1	yes
1	yes
1	yes
1	yes
1	yes
1	yes
1	yes
1	yes
1	yes
1	no
1	yes
1	yes
1	yes
1	yes
1	yes
1	yes
1	yes
1	yes
1	yes
1	yes
1	yes
1	yes
1	yes
1	yes
